# Supplementary material for: Inflammatory signals are sufficient to elicit TOX expression in mouse and human CD8+ T cells
Source: JCI journal article supplement (doi:10.1172/jci.insight.150744), 2021-05-25
Supplement: sd1 [file 1]

**Supplemental figures**  
**Maurice and Berner, *et al.***

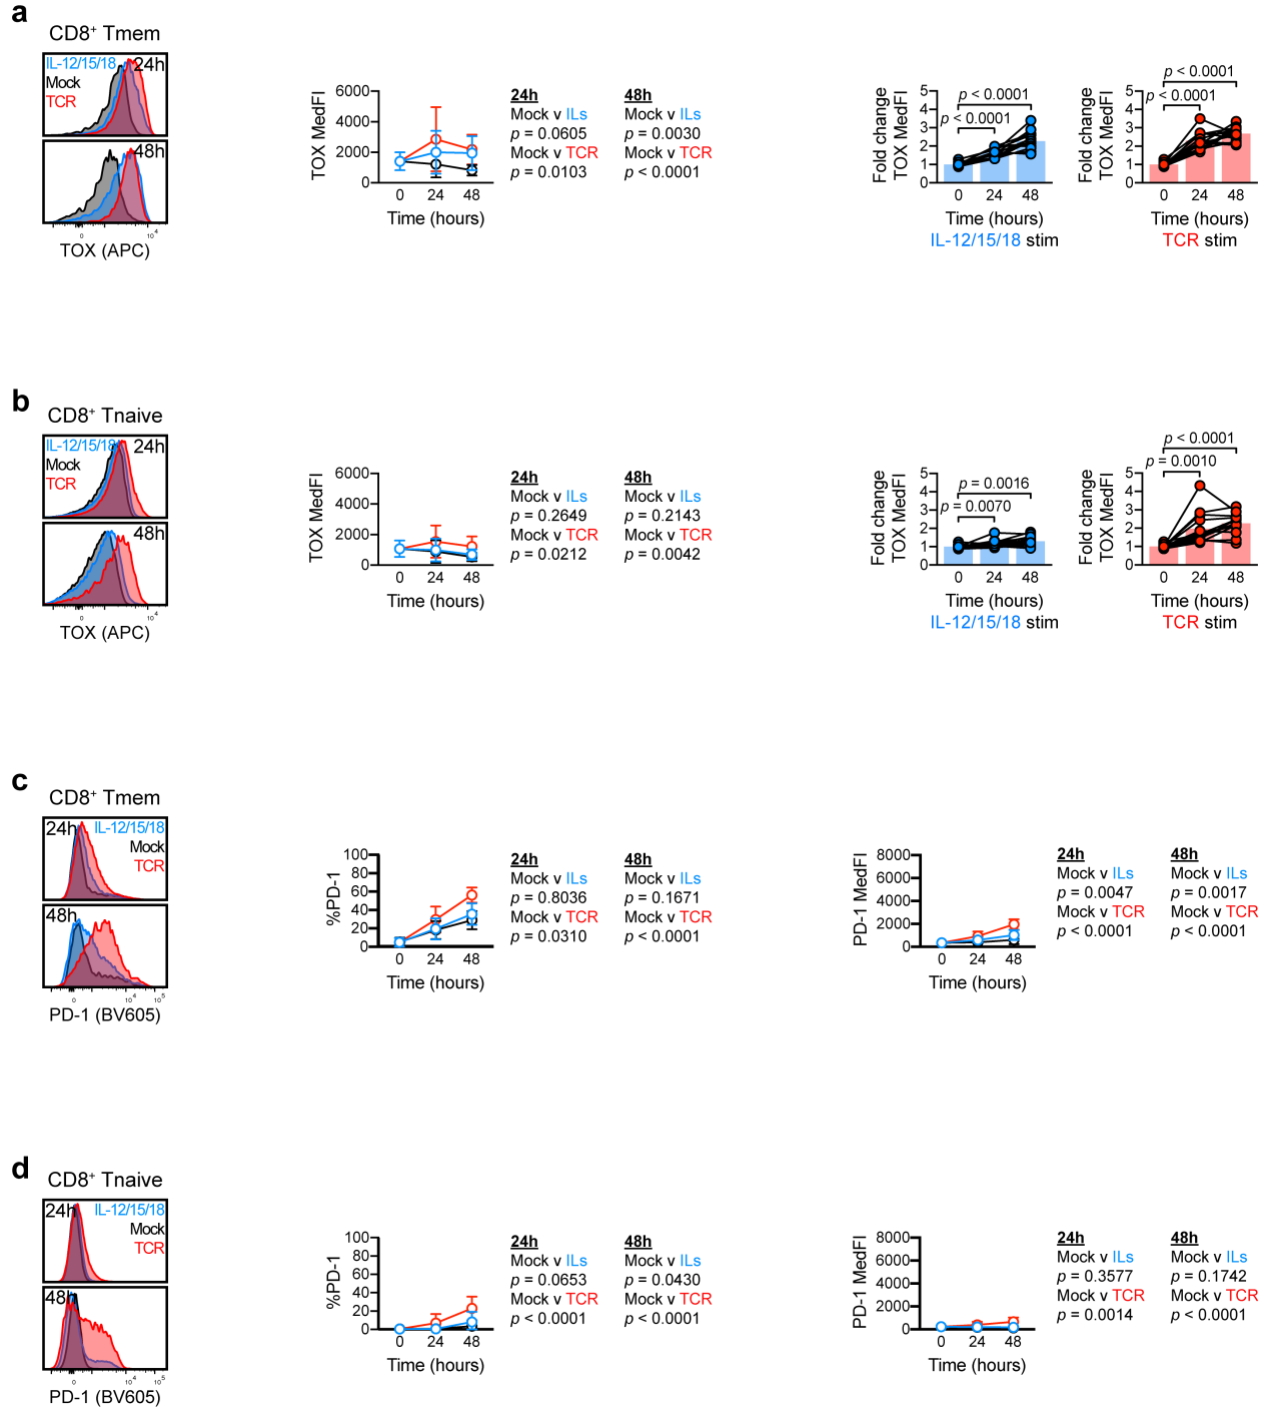

**Supplemental Fig. 1, related to Fig. 1: Cytokine stimulation induces TOX expression in murine CD8<sup>+</sup> Tmem**

**a-d** T cell stimulation responses after culture with media (mock, black), IL-12/15/18 (each at 100ng/mL, blue), or TCR agonist (1:1 bead to cell ratio, red). **a-b** Stimulation-induced changes

of TOX expression in **a** endogenous CD8<sup>+</sup> Tmem and **b** endogenous CD8<sup>+</sup> Tnaive sourced from VSV-OVA OT-I memory mice. **c-d** Stimulation-induced changes of PD-1 expression in **c** endogenous CD8<sup>+</sup> Tmem and **d** endogenous CD8<sup>+</sup> Tnaive sourced from VSV-OVA OT-I memory mice. TOX MedFI fold changes in **a** and **b** were calculated against average TOX MedFI from mock stimulations in a subset-specific, batch-specific, and timepoint-specific manner. In **a-d**, symbols in line plots comparing stimulation conditions represent the mean across all animals for a specific timepoint/condition  $\pm$  SD; the indicated statistical significances were calculated using Mann-Whitney tests. In **a** and **b**, bar chart symbols represent one animal at a unique timepoint/condition and are connected by animal identity, with bar indicating mean; the indicated statistical significances were calculated using paired t tests. All figures depict results from  $n = 14$  mice across 7 experiments. All representative flow plots are sourced from the same animal.

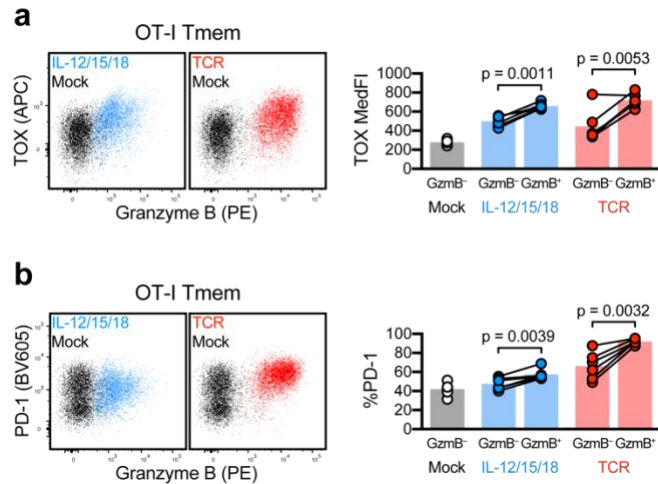

**Supplemental Fig. 2, related to Fig. 2: TOX and PD-1 expression occur in functional CD8<sup>+</sup> T cells**

T cells were isolated from VSV-OVA OT-I memory mice and stimulated (mock, black; IL-12/15/18, blue; TCR, red) for 24 hours (schematic shown in **Fig. 2a**). **a-b** Expression of **a** TOX and **b** PD-1 within granzyme B (GzmB)-positive and -negative OT-I Tmem after stimulation. Symbols in **a** and **b** represent a T cell population within a unique animal with symbols connected by animal identity ( $n = 6$  across 2 experiments). Bars represent mean and indicated statistical significances were calculated by paired t test.

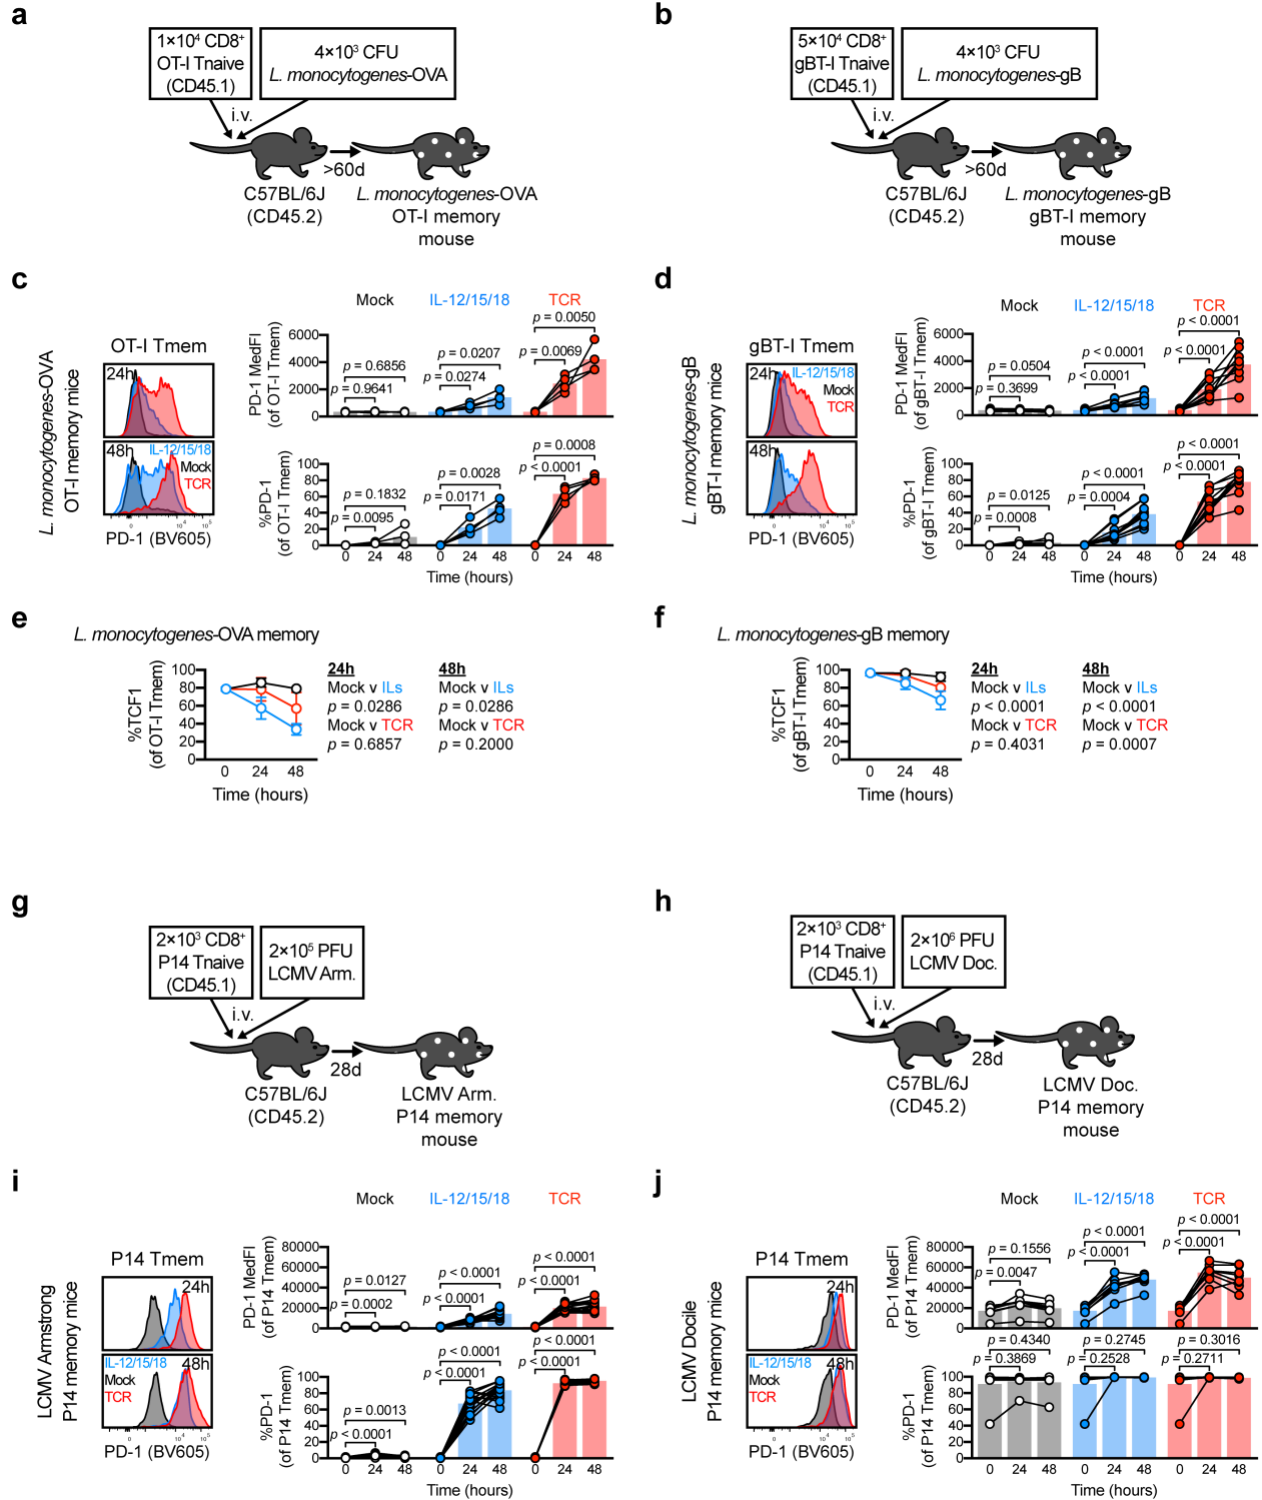

**Supplemental Figure 3, related to Fig. 3: TOX induction varies across memory T cells elicited by different infections**

**a-f** Changes in PD-1 and TCF1 expression within *L. monocytogenes*-expanded TCR transgenic Tmem. **a-b** Experiment schematic outlining the expansion of **a** OT-I (OVA-specific) and **b** gBT-I (gB-specific) transgenic T cells with *L. monocytogenes*-OVA and *L. monocytogenes*-gB, respectively. MACS-enriched T cells from these memory mice were stimulated with media alone (mock), recombinant IL-12, -15, and -18 in combination (IL-12/15/18) (each at 100ng/mL), or anti-CD3/CD28 microbeads (TCR) at a ~1:1 cell:bead ratio. **c, d** PD-1 MedFl and expression frequency within stimulated **c** OT-I Tmem or **d** gBT-I Tmem. **e, f** TCF1 expression within stimulated **e** OT-I and **f** gBT-I Tmem. **g-j** Changes in PD-1 expression within LCMV Armstrong- and Docile-expanded P14 Tmem. **g-h** Experiment schematic outlining the expansion of P14 transgenic T cells with **g** LCMV Armstrong (Arm.) or **h** LCMV Docile (Doc.), which respectively cause acute and chronic infection. **i-j** PD-1 MedFl and expression frequency within **i** LCMV Armstrong- and **j** Docile-expanded P14 Tmem. Symbols in **c, d, i, j** represent T cell populations from a single animal at a unique timepoint/condition and are connected by matched donor identities (when applicable), with bars depicting mean. Symbols in **e, f** represent mean values  $\pm$  SD. Indicated statistical significances in **c, d, i, j** were calculated by paired t tests, and those in **e, f** were calculated using Mann-Whitney tests. Data in **a-f** depict  $n = 4$  *L. monocytogenes*-OVA OT-I memory mice and  $n = 10$  *L. monocytogenes*-gB gBT-I memory mice across 2 experiments. Data in **g** and **j** depict  $n = 17$  LCMV Armstrong expanded P14 memory mice across 4 experiments and  $n = 8$  LCMV Docile expanded P14 memory mice across 2 experiments.

**a**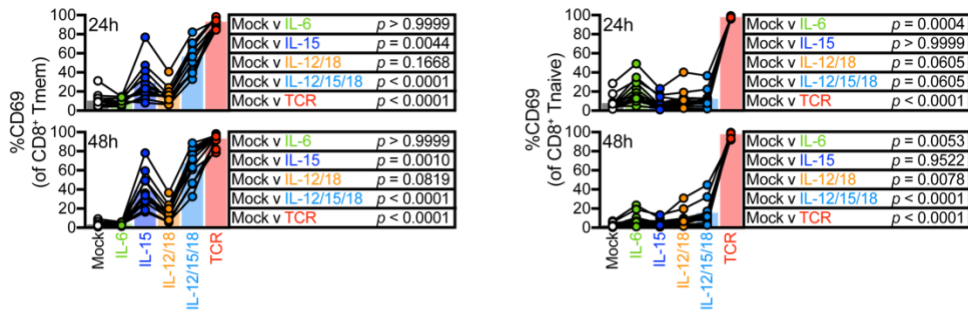**b**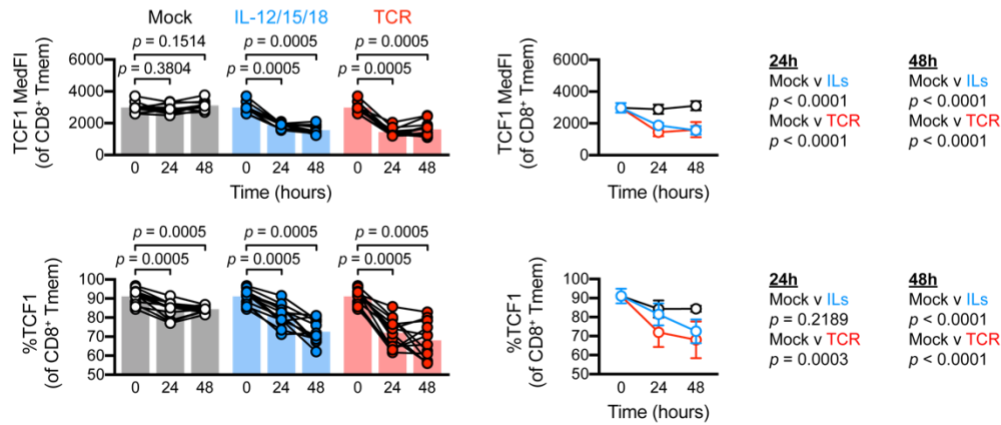**c**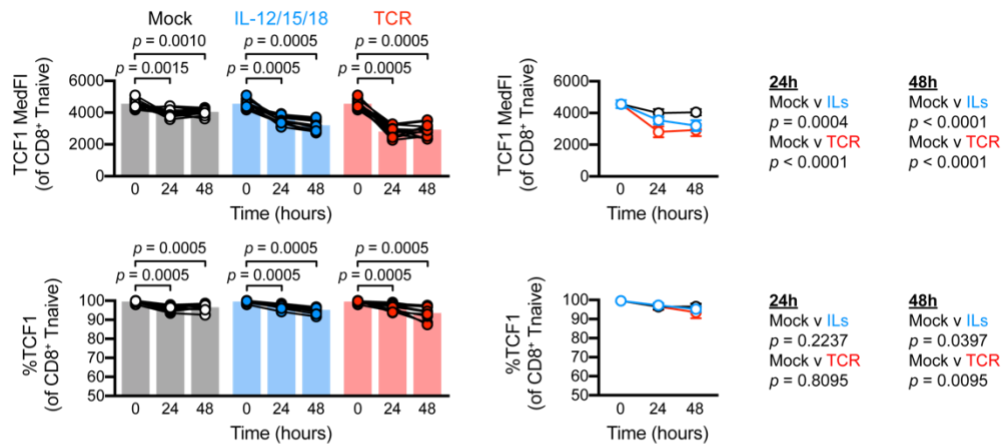**d**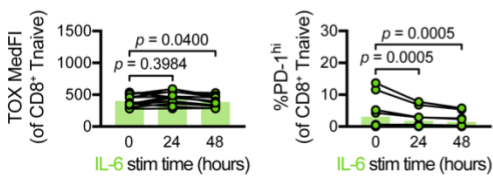**e**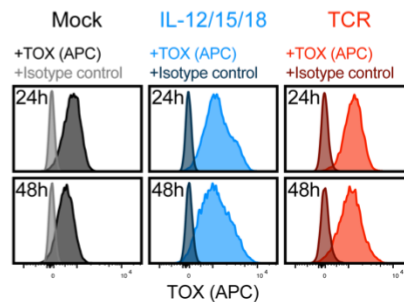

**Supplemental Figure 4., related to Fig. 4: Inflammatory cytokines are potent inducers of TOX and PD-1 in human Tmem**

**a-b** CD69 expression in stimulated CD8<sup>+</sup> Tmem (left) and CD8<sup>+</sup> Tnaive (right) subsets. **b-c** TCF1 MedFl and expression frequency in **b** CD8<sup>+</sup> Tmem and **c** CD8<sup>+</sup> Tnaive over stimulation time course (mock, black; IL-12/15/18, blue; TCR, red). **d** TOX MedFl and PD-1<sup>hi</sup> event frequencies in IL-6-stimulated CD8<sup>+</sup> Tnaive. **e** TOX and isotype control staining in mock (left), IL-12/15/18 (center), and TCR (right) stimulated CD8<sup>+</sup> Tmem. Bar plot symbols in **a-d** depict a unique donor at a specific condition/timepoint, with symbols connected by donor identity and bars depicting mean; indicated statistical significances were calculated by **a** Friedman tests with Dunn's multiple comparisons tests or **b-d** Wilcoxon matched-pairs signed rank tests. Line plot symbols in **b** and **c** depict means  $\pm$  SD across stimulation conditions with indicates statistical significances calculated by Mann-Whitney tests. **a** and **d** represent  $n = 11$  donors across 2 experiments; **b** and **c** represent  $n = 12$  donors across 2 experiments; **e** represents  $n = 3$  donors.



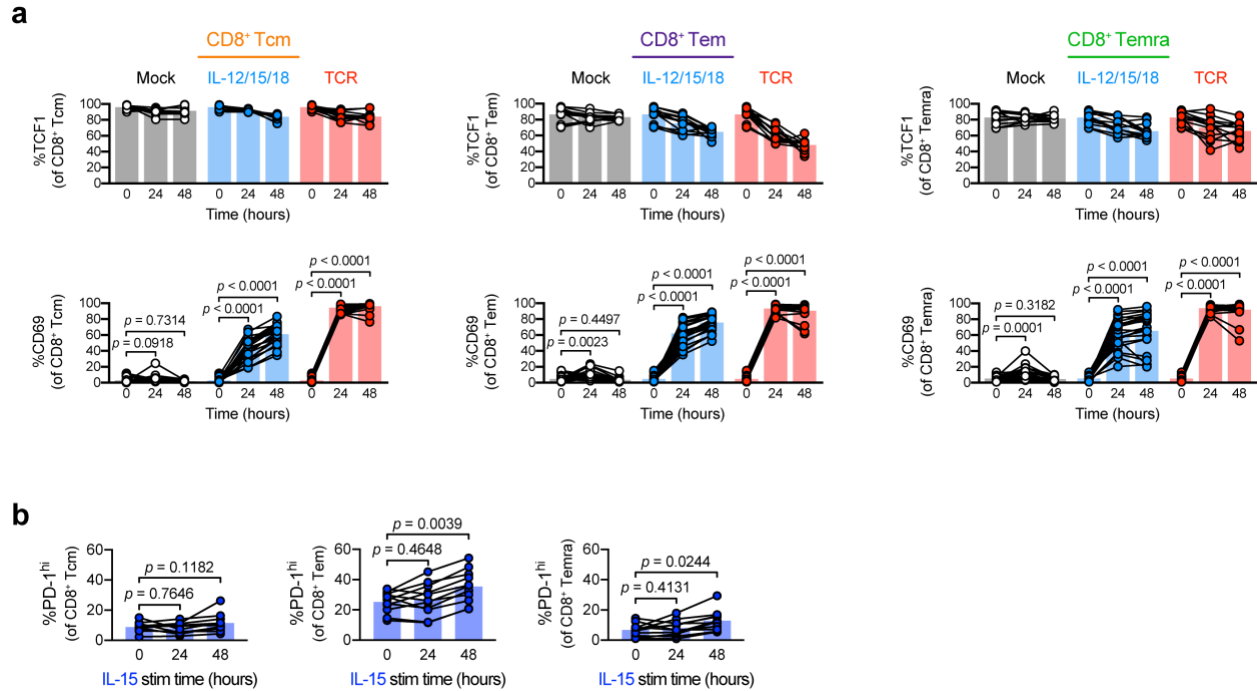

**Supplemental Figure 5, related to Fig. 5: TOX and PD-1 upregulation are largely independent of Tmem subset**

**a** TCF1 (top row) and CD69 (bottom row) event frequency within CD8<sup>+</sup> Tmem subsets after mock (black), IL-12/15/18 (blue), or TCR (red) stimulation. **b** PD-1<sup>hi</sup> event frequency within CD8<sup>+</sup> Tmem subsets after IL-15 stimulation. All cytokines were at 100ng/mL, each, in all stimulation conditions. In **a-b**, each symbol represents a cell population within a donor at a unique condition/timepoint, with symbols connected by donor identity and bar representing mean. All indicated statistical significances were calculated by Wilcoxon matched-pairs signed rank tests. Data in **a** depicts 12 (%TCF1) donors over 2 experiments and 23 donors (%CD69) over 4 experiments; **b** depicts 11 donors over 2 experiments.

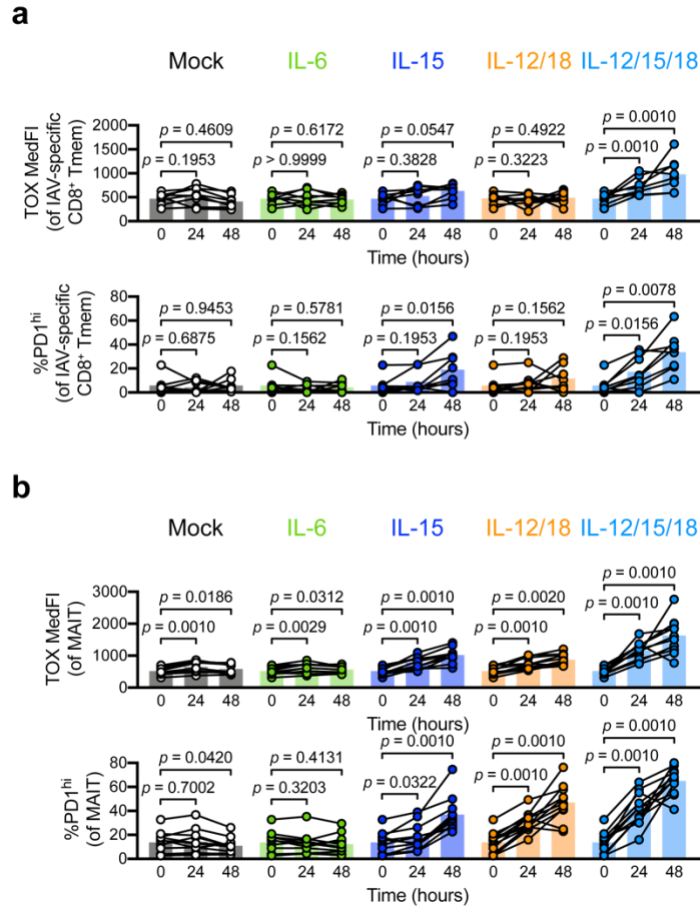

**Supplemental Figure 6, related to Fig. 6: Stimulation induces TOX and PD-1 expression in conventional and innate-like T cells**

**a-b** TOX MedFI and frequency of PD-1<sup>hi</sup> events in **c** IAV-specific CD8<sup>+</sup> T cells and **d** MAIT cells after mock (black), IL-6 (green), IL-15 (dark blue), IL-12/18 (orange), or IL-12/15/18 (blue) stimulation (all cytokine concentrations 100/ng/mL, each). Data in **a** depicts 8 donors over 2 experiments; **b** depicts 11 donors over 2 experiments. All indicated statistical significances were calculated using Wilcoxon matched-pairs signed rank tests.

**a**

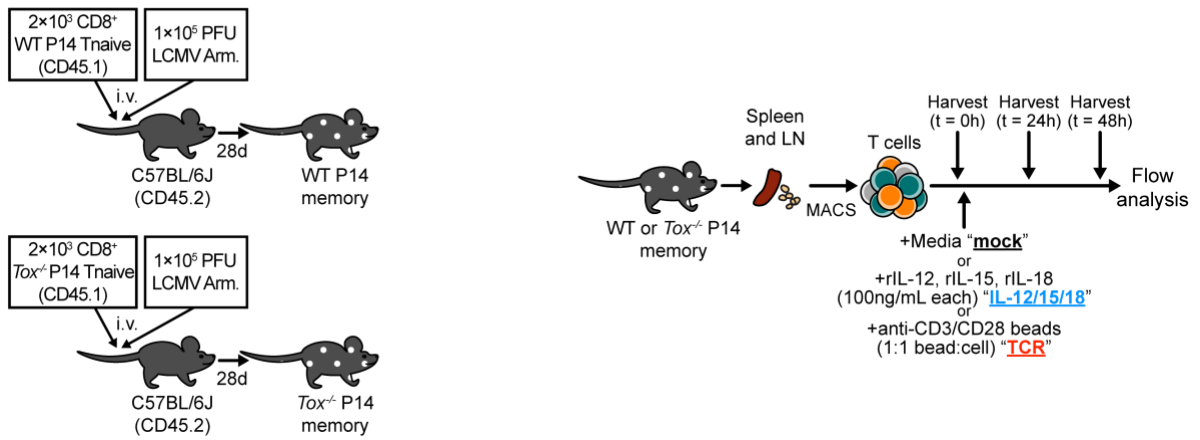

**Supplemental Figure 7, related to Fig. 7: TOX deficiency does not abrogate stimulation-induced PD-1 expression**

**a** Experiment schematic for adoptive transfers, tissue harvests, and stimulations conducted in Fig. 7.

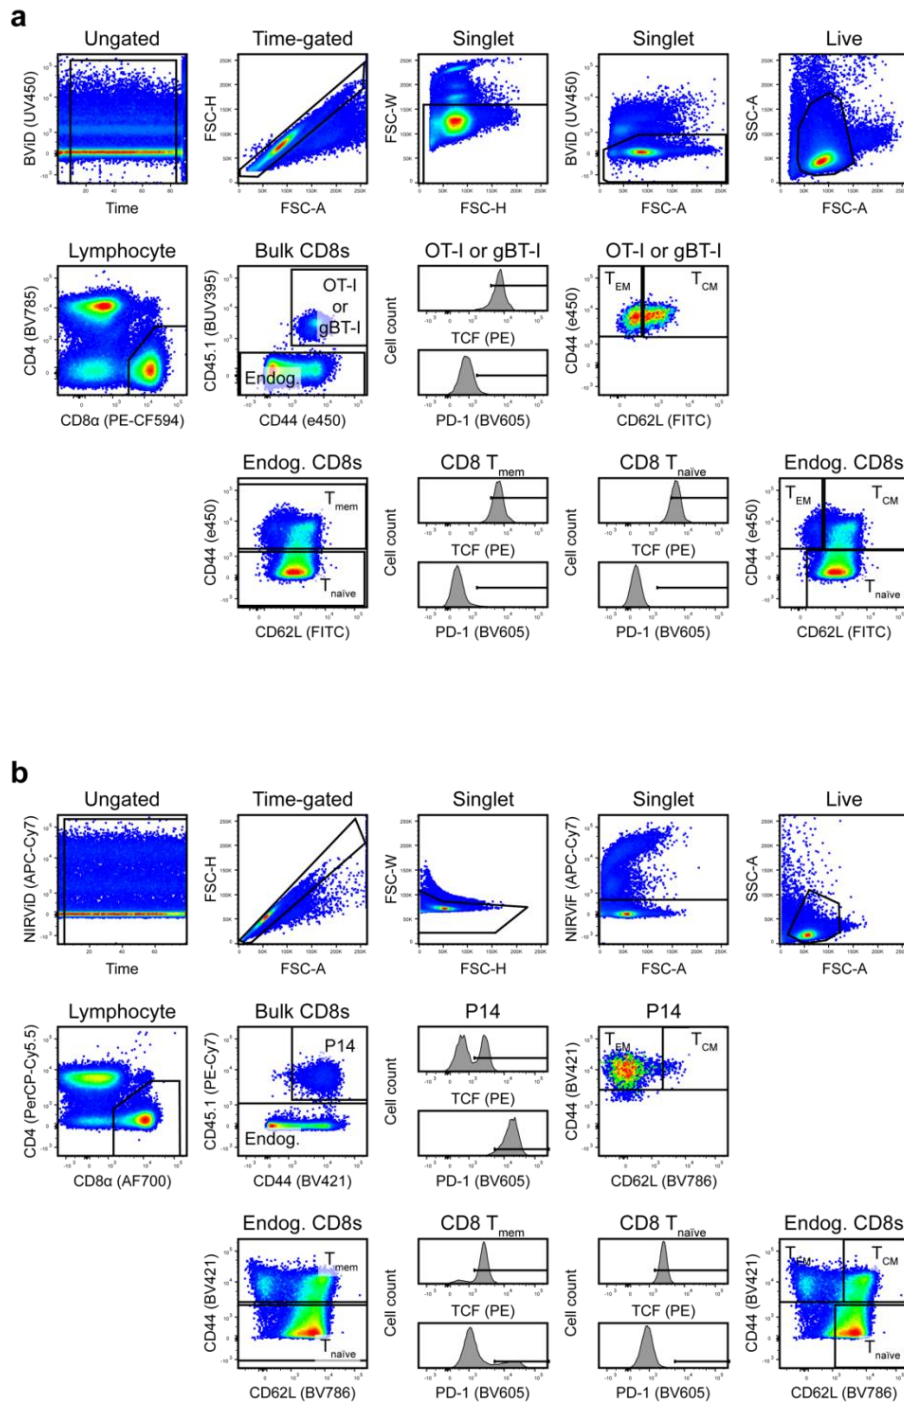

**Supplemental Figure 8, related to Fig. 1, 3, 7, Supplemental Fig. 1, 3**

**a-b** Representative flow gating for **a** VSV-OVA OT-I memory mice, LM-OVA OT-I memory mice, and LM-gB gBT-I memory mice (unstimulated, 0 h timepoint, VSV-OVA OT-I memory mouse) and **b** LCMV Armstrong- and Docile-expanded WT and Tox<sup>-/-</sup> P14 memory mice (unstimulated, 0 h timepoint, LCMV Docile WT P14 memory mouse).

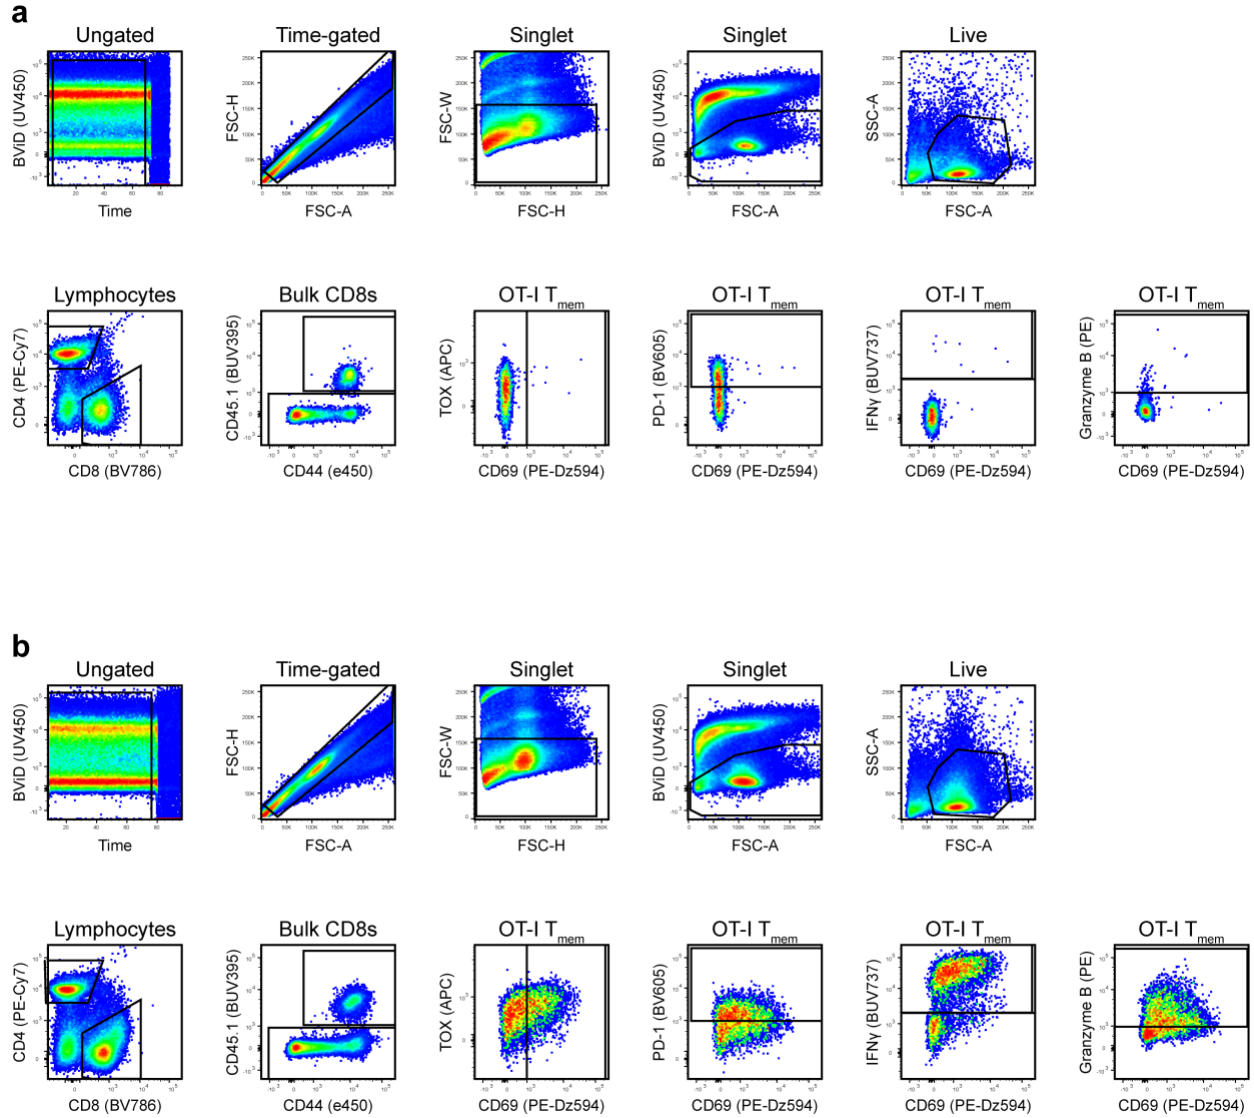

**Supplemental Fig. 9. related to Fig. 2, Supplemental Fig. 2**

**a** and **b** Representative flow gating for intracellular cytokine staining in parallel with TOX and PD-1 interrogation in mouse T cells (**a** mock-stimulated, 24h; **b** IL-12/15/18-stimulated, 24h).

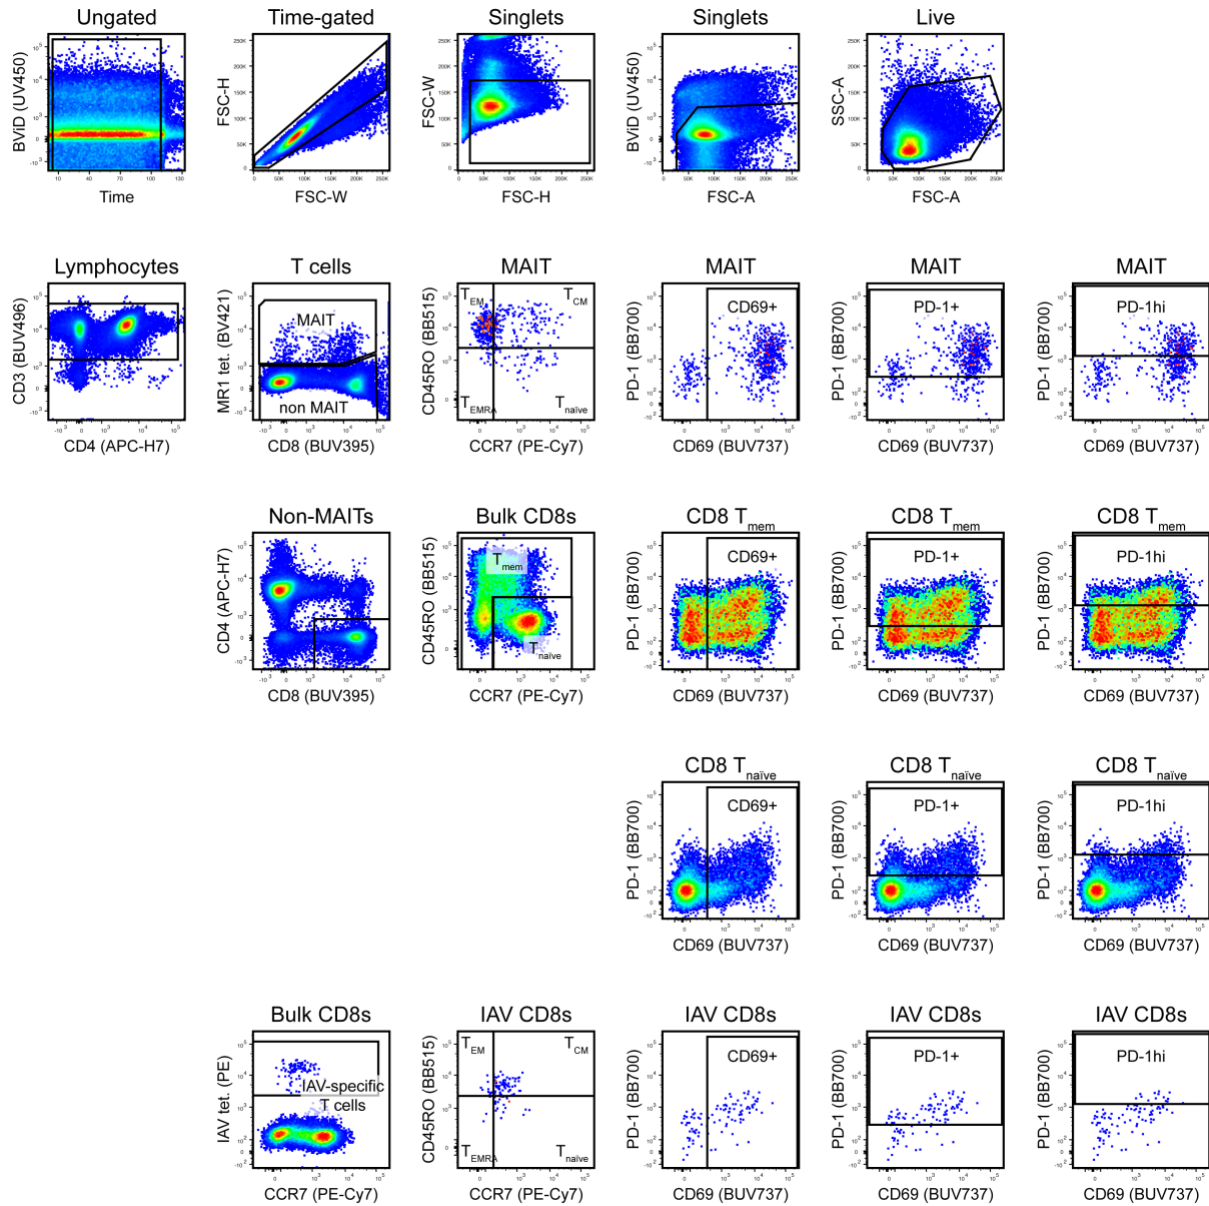

**Supplemental Fig. 10. related to Fig. 4, 5, 6, Supplemental Fig. 4, 5, 6**

Representative flow gating for TOX and PD-1 interrogation in human T cells with IAV and MR1 tetramers (IL-12/15/18-stimulated, 24h).

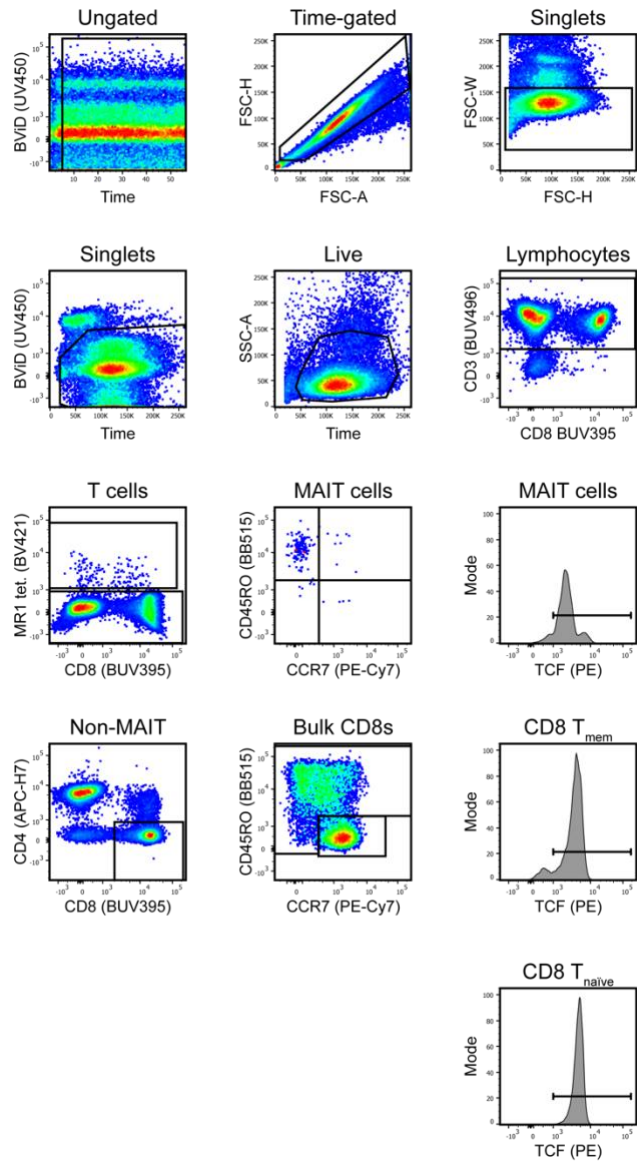

**Supplemental Fig. 11. related to Fig. 5, Supplemental Fig. 4, 5**

Representative flow gating for TOX, PD-1, and TCF1 interrogation in human T cells (unstimulated, 0h).

| Reagent                                                                                   | Fluor        | Clone    | Vendor        | Dilution |
|-------------------------------------------------------------------------------------------|--------------|----------|---------------|----------|
| Viability stain (1x PBS diluent, 20 min, on ice)                                          |              |          |               |          |
| Zombie NIR fixable viability kit (NIRViD)                                                 | APC-Cy7      | NA       | BioLegend     | 1:500    |
| Surface stain (FACSWash diluent, 30 min, on ice)                                          |              |          |               |          |
| Fc block (CD16/CD32)                                                                      | Unconjugated | 2.4G2    | BD            | 1:200    |
| CD4                                                                                       | PerCP-Cy5.5  | RM4-4    | BioLegend     | 1:200    |
| CD8 $\alpha$                                                                              | AF700        | 53-6.7   | Thermo Fisher | 1:200    |
| CD45.1                                                                                    | PE-Cy7       | A20      | Thermo Fisher | 1:200    |
| CD44                                                                                      | BV421        | IM7      | BioLegend     | 1:200    |
| PD-1                                                                                      | BV605        | 29F.1A12 | BioLegend     | 1:100    |
| CD62L                                                                                     | BV785        | MEL-14   | BioLegend     | 1:200    |
| Fix (1x eBioscience FOXP3 fixation buffer, 20 min, on ice)                                |              |          |               |          |
| Intracellular stain (1x eBioscience FOP3 permeabilization buffer diluent, 30 min, on ice) |              |          |               |          |
| Fc block (CD16/32)                                                                        | Unconjugated | 2.4G2    | BD            | 1:200    |
| TOX                                                                                       | e660         | TXRX10   | Thermo Fisher | 1:200    |
| TCF1/7                                                                                    | PE           | S33966   | BD            | 1:200    |

**Supplemental Table 1.** Mouse flow cytometry panel for SPF C57BL/6J, LCMV Armstrong P14 memory mice, and LCMV Docile P14 memory mice



| Reagent                                                                                   | Fluor        | Clone    | Vendor          | Dilution |
|-------------------------------------------------------------------------------------------|--------------|----------|-----------------|----------|
| Viability stain (1x PBS diluent, 20 min, on ice)                                          |              |          |                 |          |
| LIVE/DEAD fixable blue viability dye (BViD)                                               | UV450        | NA       | Thermo Fisher   | 1:500    |
| Surface stain (FACSWash diluent, 30 min, on ice)                                          |              |          |                 |          |
| Fc block (CD16/CD32)                                                                      | Unconjugated | 2.4G2    | BD              | 1:200    |
| CD4                                                                                       | BV786        | GK1.5    | BD              | 1:200    |
| CD8 $\alpha$                                                                              | PE-CF594     | 53-6.7   | BD              | 1:200    |
| CD45.1                                                                                    | BUV395       | A20      | BD              | 1:200    |
| CD44                                                                                      | e450         | IM7      | Thermo Fisher   | 1:200    |
| PD-1                                                                                      | BV605        | 29F.1A12 | BioLegend       | 1:100    |
| CD62L                                                                                     | FITC         | MEL-14   | Thermo Fisher   | 1:200    |
| Fix (1x eBioscience FOXP3 fixation buffer, 20 min, on ice)                                |              |          |                 |          |
| Intracellular stain (1x eBioscience FOP3 permeabilization buffer diluent, 30 min, on ice) |              |          |                 |          |
| Fc block (CD16/32)                                                                        | Unconjugated | 2.4G2    | BD              | 1:200    |
| TOX                                                                                       | APC          | REA473   | Miltenyi Biotec | 1:100    |
| TCF1/7                                                                                    | PE           | C63D9    | Cell Signaling  | 1:40     |

**Supplemental table 2.** Mouse flow cytometry panel for VSV-OVA OT-I memory mice, LM-OVA OT-I memory mice, and LM-gB gBT-I memory mice.

| Reagent                                                                                   | Fluor        | Clone    | Vendor          | Dilution |
|-------------------------------------------------------------------------------------------|--------------|----------|-----------------|----------|
| Viability stain (1x PBS diluent, 20 min, on ice)                                          |              |          |                 |          |
| LIVE/DEAD fixable aqua viability dye (AViD)                                               | V510         | NA       | Thermo Fisher   | 1:500    |
| Surface stain (FACSWash diluent, 30 min, on ice)                                          |              |          |                 |          |
| Fc block (CD16/CD32)                                                                      | Unconjugated | 2.4G2    | BD              | 1:200    |
| CD4                                                                                       | BV786        | GK1.5    | BD              | 1:200    |
| CD8 $\alpha$                                                                              | PE-CF594     | 53-6.7   | BD              | 1:200    |
| CD45.1                                                                                    | BUV395       | A20      | BD              | 1:200    |
| CD45.2                                                                                    | FITC         | 104      | Thermo Fisher   | 1:200    |
| CD44                                                                                      | APC-e780     | IM7      | Thermo Fisher   | 1:200    |
| PD-1                                                                                      | BV605        | 29F.1A12 | BioLegend       | 1:100    |
| Fix (1x eBioscience FOXP3 fixation buffer, 20 min, on ice)                                |              |          |                 |          |
| Intracellular stain (1x eBioscience FOP3 permeabilization buffer diluent, 30 min, on ice) |              |          |                 |          |
| Fc block (CD16/32)                                                                        | Unconjugated | 2.4G2    | BD              | 1:200    |
| TOX                                                                                       | APC          | REA473   | Miltenyi Biotec | 1:100    |

**Supplemental table 3.** Mouse flow cytometry panel for VSV-OVA OT-I memory mice.

| Reagent                                                                                   | Fluor        | Clone    | Vendor          | Dilution |
|-------------------------------------------------------------------------------------------|--------------|----------|-----------------|----------|
| Viability stain (1x PBS diluent, 20 min, on ice)                                          |              |          |                 |          |
| LIVE/DEAD fixable blue viability dye (BViD)                                               | UV450        | NA       | Thermo Fisher   | 1:500    |
| Surface stain (FACSWash diluent, 30 min, on ice)                                          |              |          |                 |          |
| Fc block (CD16/CD32)                                                                      | Unconjugated | 2.4G2    | BD              | 1:200    |
| CD4                                                                                       | PE-Cy7       | RM4-5    | BD              | 1:200    |
| CD8 $\alpha$                                                                              | BV786        | 53-6.7   | BD              | 1:200    |
| CD44                                                                                      | e450         | IM7      | Thermo Fisher   | 1:200    |
| CD62L                                                                                     | FITC         | MEL-14   | Thermo Fisher   | 1:200    |
| CD69                                                                                      | PE-Dazzle594 | H1.2F3   | BioLegend       | 1:100    |
| NKG2D                                                                                     | BV711        | CX5      | BD              | 1:200    |
| PD-1                                                                                      | BV605        | 29F.1A12 | BioLegend       | 1:100    |
| Fix (1x eBioscience FOXP3 fixation buffer, 20 min, on ice)                                |              |          |                 |          |
| Intracellular stain (1x eBioscience FOP3 permeabilization buffer diluent, 30 min, on ice) |              |          |                 |          |
| Fc block (CD16/32)                                                                        | Unconjugated | 2.4G2    | BD              | 1:200    |
| IFN $\gamma$                                                                              | BUV737       | XMG1.2   | BD              | 1:200    |
| Granzyme B                                                                                | PE           | GB11     | Thermo Fisher   | 1:100    |
| TOX                                                                                       | APC          | REA473   | Miltenyi Biotec | 1:100    |

**Supplemental table 4.** Mouse ICS flow cytometry panel for VSV-OVA OT-I memory mice.

| Reagent                                                                                             | Fluor  | Clone  | Vendor                       | Dilution |
|-----------------------------------------------------------------------------------------------------|--------|--------|------------------------------|----------|
| Viability stain (1x PBS diluent, 20 min, room temperature)                                          |        |        |                              |          |
| LIVE/DEAD fixable blue viability dye (BViD)                                                         | UV450  | NA     | Thermo Fisher                | 1:500    |
| Tetramer stain (FACSWash diluent, 60 min, room temperature)                                         |        |        |                              |          |
| MR1 OP-5-RU (MAIT cell) tetramer                                                                    | BV421  | NA     | NIH Tetramer Core            | 1:500    |
| HLA-A*02 influenza A virus (IAV) (GILGFVFTL) tetramer                                               | PE     | NA     | Fred Hutch Immune Monitoring | 1:150    |
| TruStain FcX (Fc block)                                                                             | NA     | NA     | BioLegend                    | 1:20     |
| Surface stain (FACSWash diluent, 20 min, room temperature)                                          |        |        |                              |          |
| CD3                                                                                                 | BUV496 | UCHT1  | BD                           | 1:40     |
| CD4                                                                                                 | APC-H7 | RPA-T4 | BD                           | 1:40     |
| CD8                                                                                                 | BUV395 | RPA-T8 | BD                           | 1:80     |
| CD45RO                                                                                              | BB515  | UCHL1  | BD                           | 1:160    |
| CD69                                                                                                | BUV737 | FN50   | BD                           | 1:40     |
| CCR7                                                                                                | PE-Cy7 | 3D12   | BD                           | 1:40     |
| PD-1                                                                                                | BB700  | EH12.1 | BD                           | 1:20     |
| Fix (1x eBioscience FOXP3 fixation buffer, 20 min, room temperature)                                |        |        |                              |          |
| Intracellular stain (1x eBioscience FOP3 permeabilization buffer diluent, 30 min, room temperature) |        |        |                              |          |
| TOX*                                                                                                | APC    | REA473 | Miltenyi Biotec              | 1:80     |
| KLH-specific REA control antibody I*                                                                | APC    | REA293 | Miltenyi Biotec              | 1:80     |

**Supplemental table 5.** Flow cytometry panel for HLA-A\*02 human PBMC samples.

\*Reagents were not used in unison, but as stains in separate samples.

| Reagent                                                                                             | Fluor  | Clone  | Vendor            | Dilution |
|-----------------------------------------------------------------------------------------------------|--------|--------|-------------------|----------|
| Viability stain (1x PBS diluent, 20 min, room temperature)                                          |        |        |                   |          |
| LIVE/DEAD fixable blue viability dye (BViD)                                                         | UV450  | NA     | Thermo Fisher     | 1:500    |
| Tetramer stain (FACSWash diluent, 60 min, room temperature)                                         |        |        |                   |          |
| MR1 OP-5-RU (MAIT cell) tetramer                                                                    | BV421  | NA     | NIH Tetramer Core | 1:500    |
| TruStain FcX (Fc block)                                                                             | NA     | NA     | BioLegend         | 1:20     |
| Surface stain (FACSWash diluent, 20 min, room temperature)                                          |        |        |                   |          |
| CD3                                                                                                 | BUV496 | UCHT1  | BD                | 1:40     |
| CD4                                                                                                 | APC-H7 | RPA-T4 | BD                | 1:40     |
| CD8                                                                                                 | BUV395 | RPA-T8 | BD                | 1:80     |
| CD45RO                                                                                              | BB515  | UCHL1  | BD                | 1:160    |
| CD69                                                                                                | BUV737 | FN50   | BD                | 1:40     |
| CCR7                                                                                                | PE-Cy7 | 3D12   | BD                | 1:40     |
| PD-1                                                                                                | BB700  | EH12.1 | BD                | 1:20     |
| Fix (1x eBioscience FOXP3 fixation buffer, 20 min, room temperature)                                |        |        |                   |          |
| Intracellular stain (1x eBioscience FOP3 permeabilization buffer diluent, 30 min, room temperature) |        |        |                   |          |
| TOX                                                                                                 | APC    | REA473 | Miltenyi Biotec   | 1:80     |
| TCF1/7                                                                                              | PE     | C63D9  | Cell Signaling    | 1:40     |

**Supplemental table 6.** Flow cytometry panel for general human PBMC samples.
